# Supplementary material for: YC-1 Prevents Tumor-Associated Tissue Factor Expression and Procoagulant Activity in Hypoxic Conditions by Inhibiting p38/NF-κB Signaling Pathway
Source: PubMed Central journal article supplement (PMC6359014; doi:10.3390/ijms20020244), 2019-01-09
Supplement: ijms-20-00244-s001.pdf [file ijms-20-00244-s001.pdf]

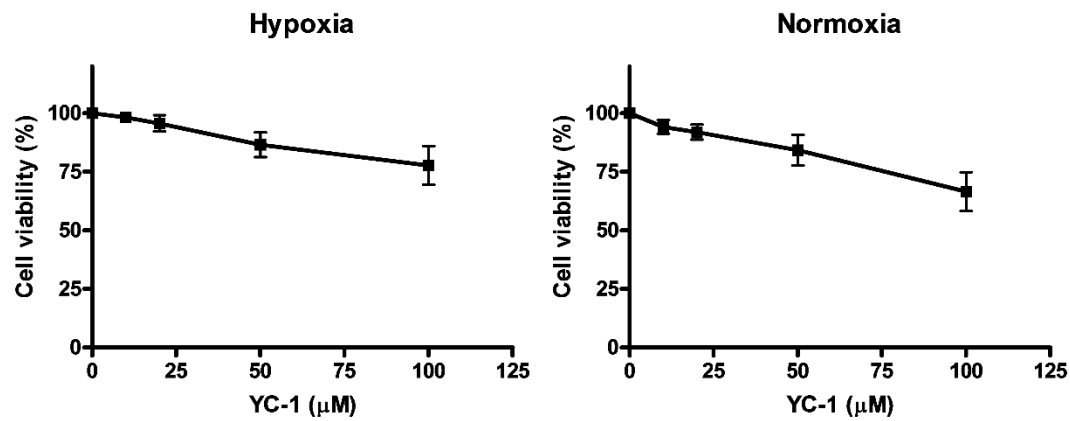

**Figure S1** Effect of YC-1 on cell viability of A549 cells. A549 cells were pretreated with YC-1 for 1 hour and incubated under hypoxic or normoxic conditions for 24 hours. The effect of YC-1 on cell viability was determined by MTT assay.

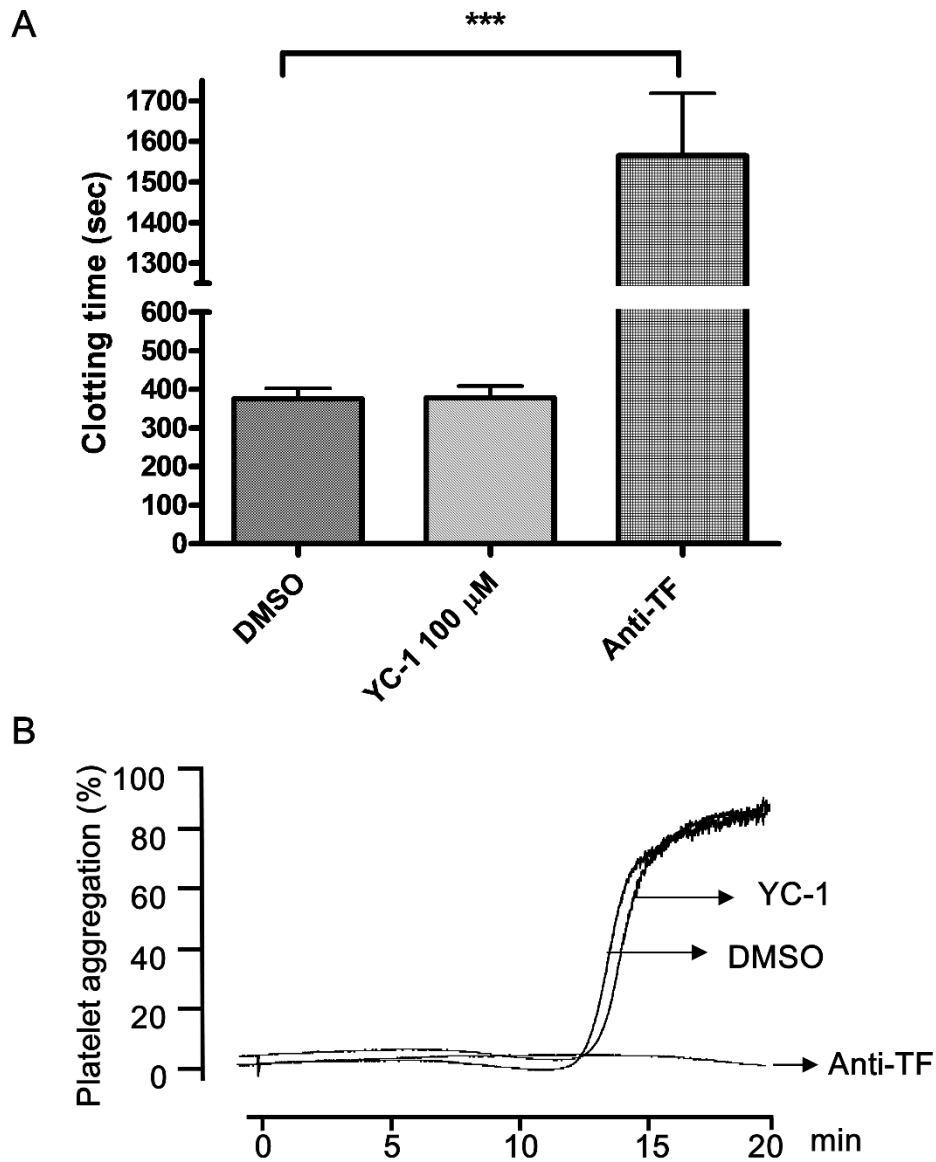

**Figure S2** Effects of YC-1 on A549 cell-induced plasma clotting and platelet aggregation in normoxic conditions. A549 cells were treated with DMSO or YC-1 (100  $\mu$ M) for 24 hours in normoxia. Cancer cell-induced plasma clotting (A) and platelet aggregation (B) were determined as described in Methods. Anti-TF antibody (20  $\mu$ g/ml) was used as positive control. All results are presented as mean  $\pm$  SEM ( $n = 3$ ). \*\*\* =  $P < 0.001$ .

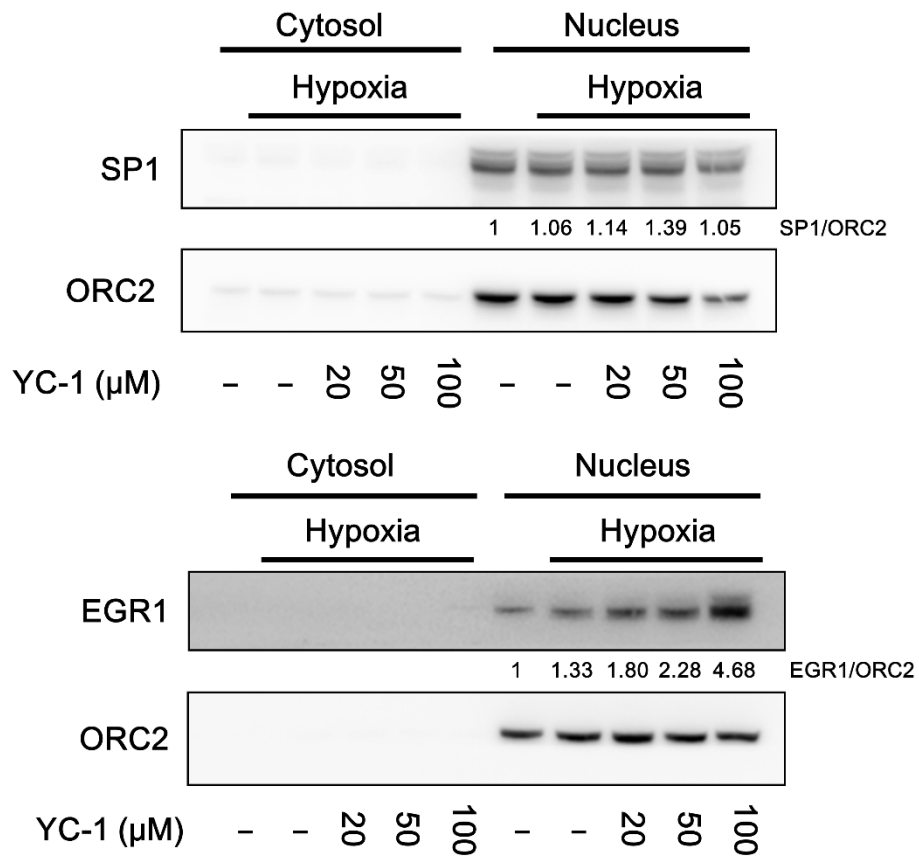

**Figure S3** Effects of YC-1 on nuclear translocation of Sp1 and Egr1 in A549 cells. A549 cells were pretreated with YC-1 for 1 hour and exposed to hypoxia for 1 hour. Protein levels of SP1, and Egr-1, and in the nuclear and cytoplasmic fractions were determined by Western blot.

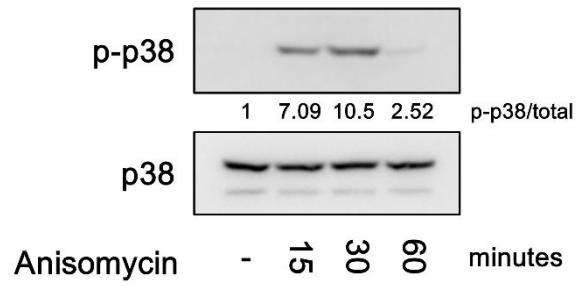

**Figure S4** p38 activation by p38 activator in A549 cells. Cells were treated with anisomycin (0.1  $\mu$ M) for indicated times. Protein expression were determined by Western blot.
